# Supplementary material
Source: Royal Society of Chemistry journal article supplement (doi:10.1039/d6qi00145a)
Supplement: d6qi00145a1.pdf [file d6qi00145a1.pdf]

## Supplementary Information

### **Ammonium Vanadium Oxide Nanobelt-Integrated Sulfur Hosts Enabling Enhanced Polysulfide Redox Kinetics in Lithium–Sulfur Batteries**

Kiseok Lee,<sup>†a</sup> Eun Ji Lee,<sup>†a</sup> Hyung-Kyu Lim,<sup>\*b</sup> Ji Eun Lee<sup>\*a</sup>

*<sup>a</sup>Department of Chemical Engineering, Chonnam National University, Gwangju 61186, Republic of Korea. E-mail: jelee@jnu.ac.kr*

*<sup>b</sup>Department of Chemical Engineering and Bioengineering, Kangwon National University, Chuncheon 24341, Republic of Korea. E-mail: hklm@kangwon.ac.kr*

## Supporting Figures

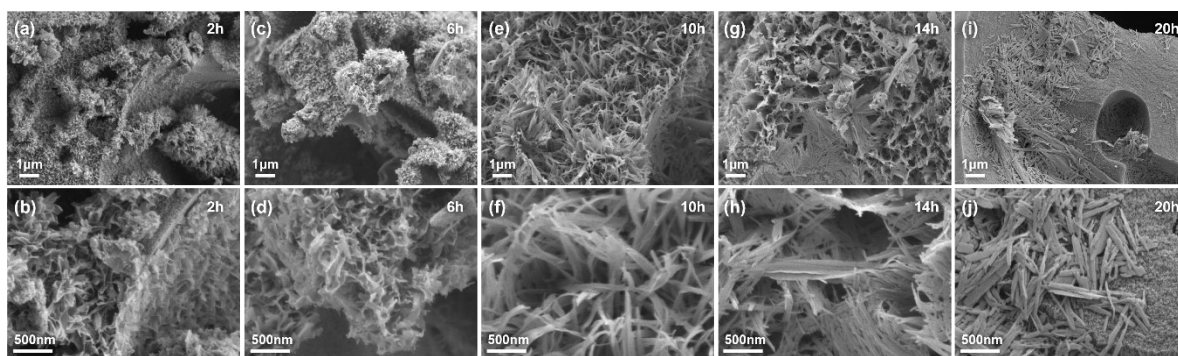

**Fig. S1** SEM Images of NVO/AC composites synthesized at different hydrothermal reaction times: (a, b) 2h, (c, d) 6h, (e, f) 10h, (g, h) 14h, (i, j) 20h.

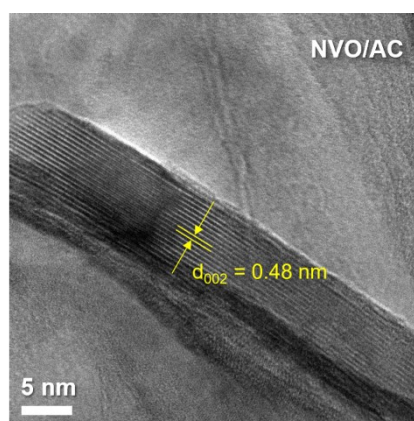

**Fig S2.** TEM image of NVO/AC.

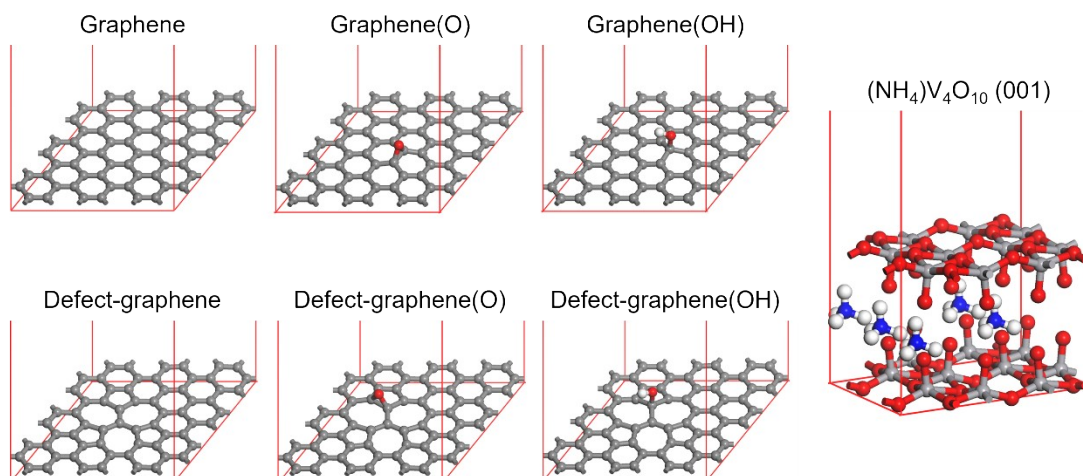

**Fig. S3.** Optimized surface models used in the DFT calculations: pristine graphene, graphene with adsorbed oxygen (\*O), graphene with adsorbed hydroxyl (\*OH), defect-graphene, defect-graphene with \*O, defect-graphene with \*OH, and the (NH<sub>4</sub>)V<sub>4</sub>O<sub>10</sub> (001) surface.

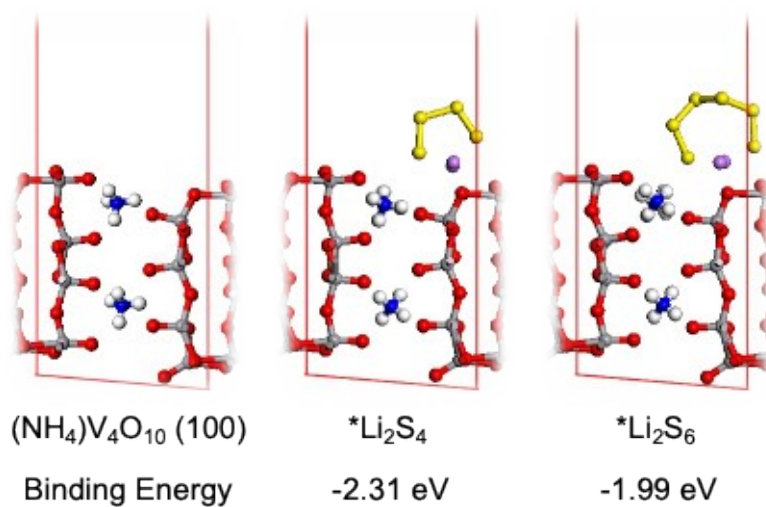

**Fig. S4.** DFT results for Li<sub>2</sub>S<sub>4</sub> and Li<sub>2</sub>S<sub>6</sub> adsorption on the NVO (100) surface.

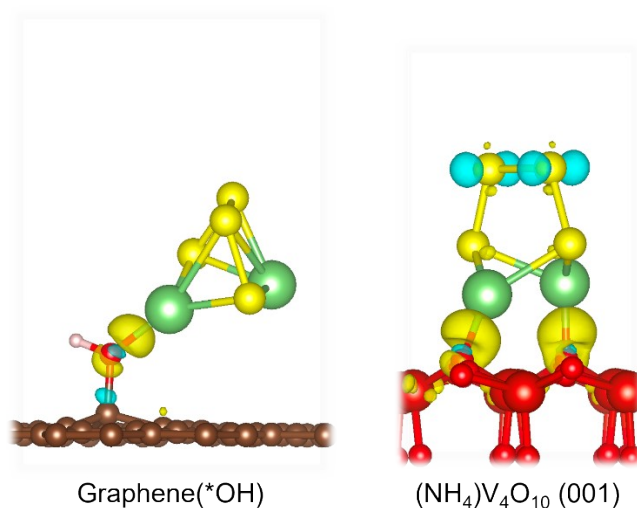

**Fig. S5.** Differential charge density plots for Li<sub>2</sub>S<sub>4</sub> adsorbed on (left) the graphene(\*OH) surface and (right) the NVO (001) surface. Yellow and cyan isosurfaces represent electron accumulation and depletion regions, respectively (isosurface level = 0.005 e/Å<sup>3</sup>).

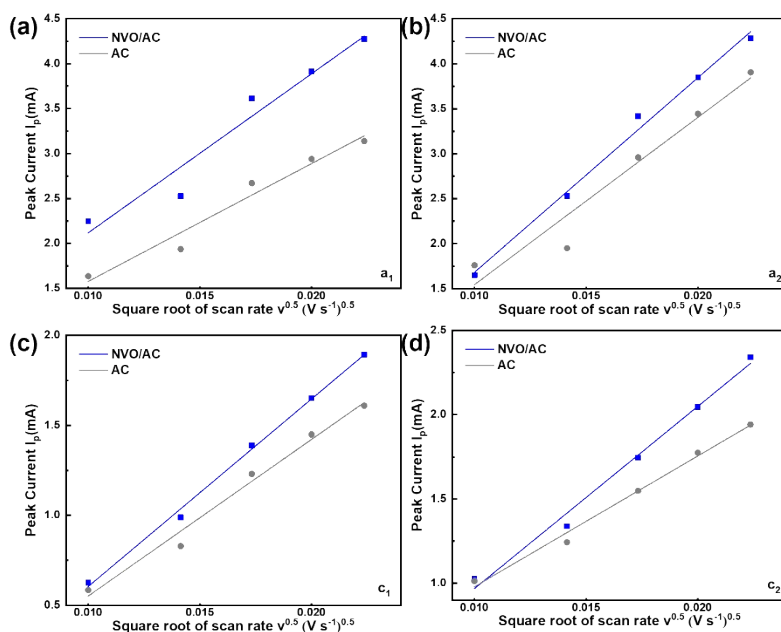

**Fig. S6** Linear relationship between anodic and cathodic peak currents and the square root of the scan rate obtained from CV analysis.

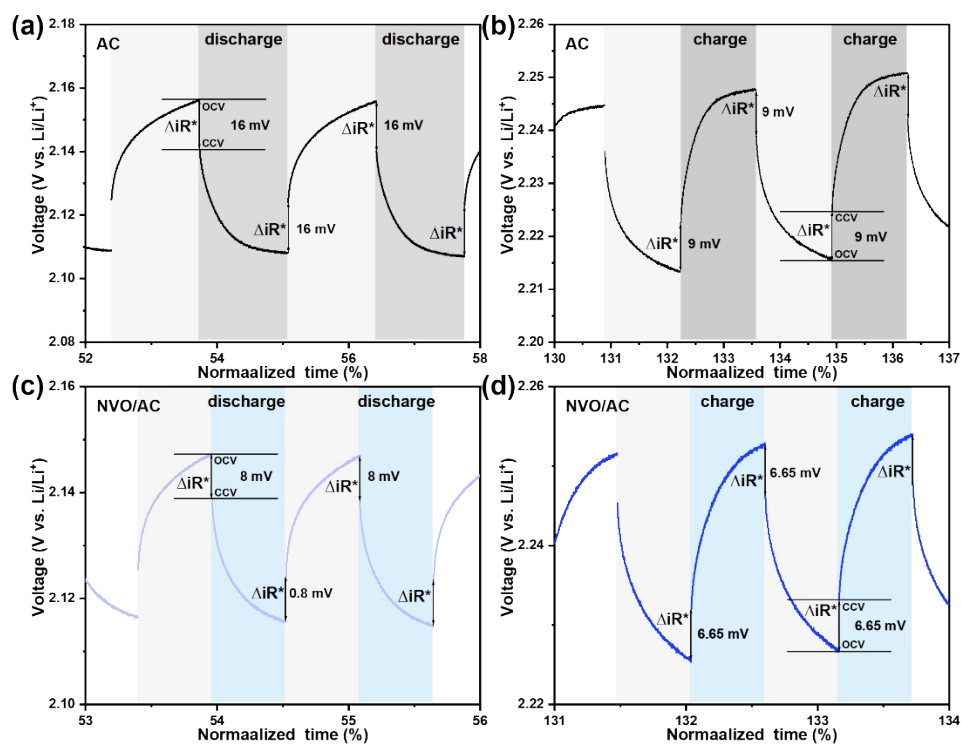

**Fig. S7** Enlarged GITT plots of (a, b) AC and (c, d) NVO/AC.

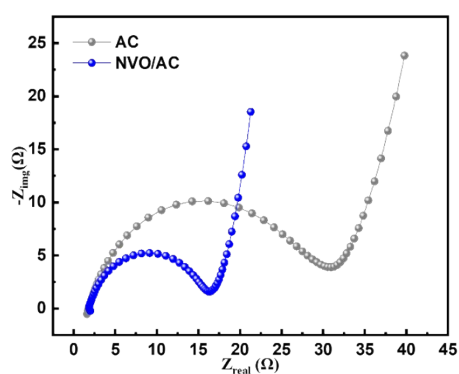

**Fig. S8** Nyquist plots comparing the resistance of AC and NVO/AC.

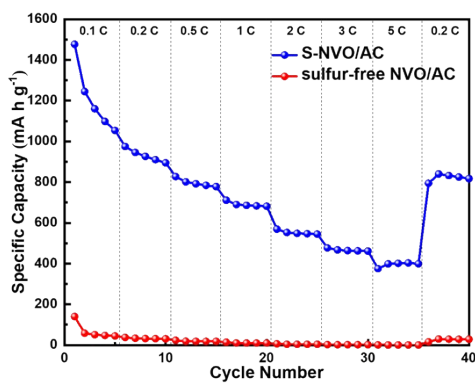

**Fig. S9.** Rate performance of NVO/AC with and without sulfur loading at various C-rates.

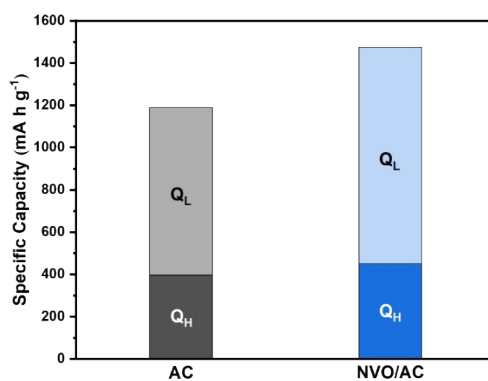

**Fig. S10** Higher plateau capacity ( $Q_H$ ) and lower plateau capacity ( $Q_L$ ) of AC and NVO/AC from initial discharge profiles at 0.1 C.

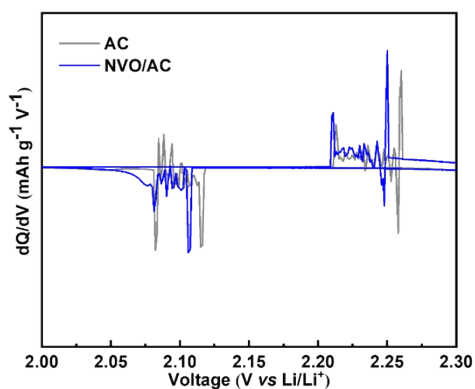

**Fig. S11** Differential capacity ( $dQ/dV$ ) profiles from initial charge-discharge of AC and NVO/AC.

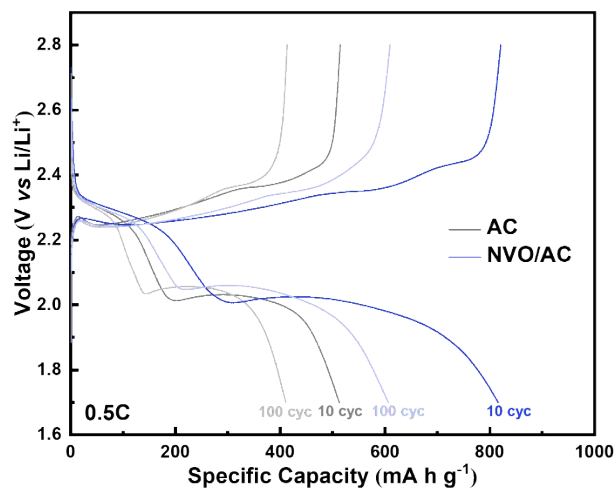

**Fig. S12** Voltage profiles of AC and NVO/AC at the 10<sup>th</sup> and 100<sup>th</sup> cycles (0.5C).

**Table S1.** Comparison of the electrochemical performance of the NVO/AC composite with previously reported vanadium-based sulfur host materials for Li-S batteries.

| Material                                | Initial capacity (mA h g <sup>-1</sup> ) | Cycle number, retention | Ref.      |
|-----------------------------------------|------------------------------------------|-------------------------|-----------|
| V <sub>2</sub> O <sub>5</sub> @N-MWCNTs | 1453 (@ 0.1C)                            | 200 cycles, 0.5C, 60%   | S1        |
| V <sub>2</sub> O <sub>5</sub>           | 1209 (@ 0.1C)                            | 100 cycles, 0.2C, 87%   | S2        |
| VO <sub>2</sub> -VS <sub>2</sub>        | 1236 (@ 0.2C)                            | 500 cycles, 1C, 50.6%   | S3        |
| rGO-VS <sub>2</sub> /S                  | 1289.3 (@ 0.1C)                          | 200 cycles, 0.2C, 77.8% | S4        |
| NVO/AC                                  | 1476.96 (@ 0.1C)                         | 300 cycles, 0.5C, 59.4% | This work |

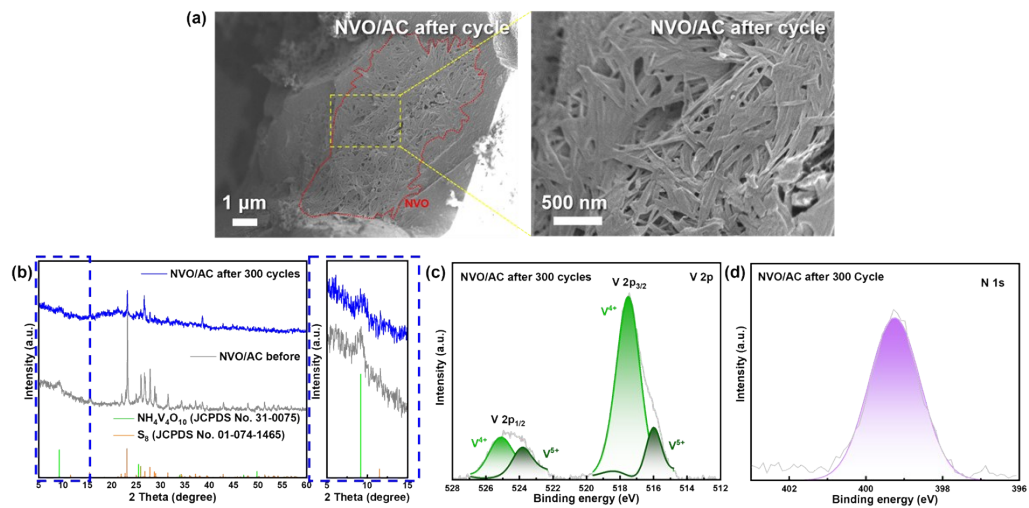

**Fig. S13** (a) XRD pattern graphs of before and after 300 cycles at 0.5 C. XPS spectra (b) V 2p and (c) N 1s of NVO/AC after 300 cycles.

## Supporting equations

A. Beweick, M. Fleischman, and H.R Thirsk (BFT) Model

| 2D Instantaneous nucleation (2DI)                                                                         | 2D Progressive nucleation (2DP)                                                                               |
|-----------------------------------------------------------------------------------------------------------|---------------------------------------------------------------------------------------------------------------|
| $\frac{i}{i_m} = \left(\frac{t}{t_m}\right) \left\{ \exp\left[\frac{t^2 - t_m^2}{2t_m^2}\right] \right\}$ | $\frac{i}{i_m} = \left(\frac{t}{t_m}\right) \left\{ \exp\left[\frac{-2(t^3 - t_m^3)}{3t_m^3}\right] \right\}$ |
| (S1)                                                                                                      | (S2)                                                                                                          |

Scharifker-Hills (SH) Model

| 3D Instantaneous nucleation (3DI)                                                                                                 | 3D Progressive nucleation (3DP)                                                                                                     |
|-----------------------------------------------------------------------------------------------------------------------------------|-------------------------------------------------------------------------------------------------------------------------------------|
| $\frac{i}{i_m} = \left(\frac{1.9542}{t/t_m}\right)^{1/2} \left\{ 1 - \exp\left[-1.2564\left(\frac{t}{t_m}\right)\right] \right\}$ | $\frac{i}{i_m} = \left(\frac{1.2254}{t/t_m}\right)^{1/2} \left\{ 1 - \exp\left[-2.3367\left(\frac{t}{t_m}\right)^2\right] \right\}$ |
| (S3)                                                                                                                              | (S4)                                                                                                                                |

Where  $I_p$  represents maximum peak current,  $t_m$  represents the time corresponding the current reach the maximum current.<sup>S5</sup>

## References

- S1. C. Liu, M. Xiang, H. Zhang, S. Feng, J. Xiao, S. Ma and X. Li, Preparation and Electrochemical Performance of  $V_2O_5$  @N-CNT/S Composite Cathode Materials, *Frontiers in Energy Research*, 2021, **8**, 615558.
- S2. R. Carter, L. Oakes, N. Muralidharan, A. P. Cohn, A. Douglas and C. L. Pint, Polysulfide Anchoring Mechanism Revealed by Atomic Layer Deposition of  $V_2O_5$  and Sulfur-Filled Carbon Nanotubes for Lithium–Sulfur Batteries, *ACS Appl. Mater. Interfaces*, 2017, **9**, 7185-7192.
- S3. T. Zhang, C. Zha, S. Liu and L. Zhou, Boosting the polysulfide conversion by  $VO_2$ - $VS_2$  heterostructure for lithium-sulfur batteries, *J. Alloys Compd.*, 2023, **955**, 170285.
- S4. Z. Cheng, Z. Xiao, H. Pan, S. Wang and R. Wang, Elastic Sandwich-Type rGO– $VS_2$ /S Composites with High Tap Density: Structural and Chemical Cooperativity Enabling Lithium–Sulfur Batteries with High Energy Density, *Adv. Energy Mater.*, 2017, **8**, 1702337.
- S5. J. Sun, Y. Liu, L. Liu, J. Bi, S. Wang, Z. Du, H. Du, K. Wang, W. Ai and W. Huang, Interface Engineering Toward Expedited  $Li(2) S$  Deposition in Lithium-Sulfur Batteries: A Critical Review, *Adv. Mater.*, 2023, **35**, e2211168.
